# Supplementary material for: A pathways-based prediction model for classifying breast cancer subtypes
Source: PubMed Central journal article supplement (PMC5601695; doi:10.18632/oncotarget.18544), 2017-06-17
Supplement: oncotarget-08-58809-s001.pdf [file oncotarget-08-58809-s001.pdf]

## **A pathways-based prediction model for classifying breast cancer subtypes**

### **Supplementary Materials**

**Supplementary Table 1: Functional pathway analysis of the genes specific for TN subtype.** See [Supplementary\\_Table\\_1](#)

**Supplementary Table 2: Functional pathway analysis of the genes specific for HER2+ subtype.** See [Supplementary\\_Table\\_2](#)

**Supplementary Table 3: Functional pathway analysis of the genes specific for LA subtype.** See [Supplementary\\_Table\\_3](#)

**Supplementary Table 4: Functional pathway analysis of the genes specific for LB subtype.** See [Supplementary\\_Table\\_4](#)
